# Supplementary material
Source: publisher figshare collection journal article supplement (https://acs.figshare.com/ndownloader/files/14926736)
Supplement: Supplementary file 1 [file 14926736]

298.15	1e-06	1.73967e-05	0.0174455	0.241245	2.58886e-05	2.15147e-11
298.15	3e-06	5.47801e-05	0.0306458	0.234646	8.14455e-05	3.84297e-10
298.15	1e-05	0.000173437	0.0528312	0.223556	0.000250274	6.37458e-09
298.15	3.2e-05	0.000538916	0.0891085	0.205422	0.000756042	1.03475e-07
298.15	0.0001	0.00165699	0.144827	0.177568	0.00221783	1.57336e-06
298.15	0.000316	0.00499997	0.221627	0.139165	0.00622764	2.15993e-05
298.15	0.001	0.0146132	0.310407	0.0946648	0.0165245	0.000254499
298.15	0.003162	0.0401454	0.388264	0.0546828	0.040543	0.00236817
298.15	0.01	0.0954114	0.429663	0.0278303	0.0845938	0.0146766
298.15	0.031623	0.175196	0.423694	0.0135993	0.131802	0.049107
298.15	0.1	0.246415	0.393894	0.00749792	0.157063	0.0911105
298.15	0.316228	0.288319	0.371556	0.0053081	0.165078	0.117828
298.15	1.0	0.306245	0.361566	0.00458648	0.167189	0.129261
323.15	1e-06	1.09768e-05	0.0121897	0.243815	1.52332e-05	5.78601e-12
323.15	3e-06	3.3444e-05	0.021392	0.239217	4.75854e-05	1.00586e-10
323.15	1e-05	0.000106589	0.0373659	0.231236	0.000148893	1.75741e-09
323.15	3.2e-05	0.000332906	0.0640233	0.217916	0.00045704	2.90615e-08
323.15	0.0001	0.00103176	0.106747	0.196568	0.00137386	4.61765e-07
323.15	0.000316	0.0031537	0.170208	0.164852	0.00399766	6.77214e-06
323.15	0.001	0.0094019	0.252907	0.123482	0.0110752	8.7683e-05
323.15	0.003162	0.0267519	0.340132	0.0794601	0.0285919	0.000933316
323.15	0.01	0.0686723	0.405208	0.0438211	0.0651049	0.00714684
323.15	0.031623	0.142404	0.424629	0.0219026	0.115469	0.0315656
323.15	0.1	0.223452	0.404202	0.011356	0.151168	0.0730856
323.15	0.316228	0.279881	0.379041	0.00730044	0.164767	0.106359
323.15	1.0	0.306947	0.365622	0.00592956	0.168545	0.122519
348.15	1e-06	7.23461e-06	0.00898124	0.245293	9.70464e-06	1.76156e-12
348.15	3e-06	2.19017e-05	0.0156782	0.24195	2.99207e-05	3.22591e-11
348.15	1e-05	6.94955e-05	0.0274511	0.236074	9.35464e-05	5.54992e-10
348.15	3.2e-05	0.000219253	0.0475203	0.226056	0.000290219	9.46552e-09
348.15	0.0001	0.000684056	0.0806092	0.209538	0.000887281	1.54585e-07
348.15	0.000316	0.0021106	0.132108	0.183826	0.00264622	2.37434e-06
348.15	0.001	0.00638239	0.204787	0.147517	0.00758801	3.29861e-05
348.15	0.003162	0.0186057	0.291811	0.103868	0.0204579	0.000389041
348.15	0.01	0.0502107	0.371515	0.0624886	0.0496853	0.00348998
348.15	0.031623	0.114389	0.414807	0.0328588	0.0980612	0.0194722
348.15	0.1	0.199266	0.410089	0.0167001	0.142127	0.0565102
348.15	0.316228	0.268731	0.385909	0.00992525	0.162607	0.0942399
348.15	1.0	0.306257	0.369545	0.007549	0.168803	0.115357
373.15	1e-06	4.73634e-06	0.00665748	0.24621	6.13786e-06	6.82621e-13
373.15	3e-06	1.52916e-05	0.0118312	0.243633	1.95514e-05	1.1757e-11
373.15	1e-05	4.82283e-05	0.0208779	0.239126	6.18581e-05	2.02887e-10
373.15	3.2e-05	0.00015267	0.0363437	0.231422	0.000192738	3.47308e-09
373.15	0.0001	0.000477756	0.0623761	0.218451	0.000595942	5.79575e-08
373.15	0.000316	0.00148419	0.104181	0.197616	0.00180816	9.21397e-07
373.15	0.001	0.00453465	0.166472	0.166555	0.00532098	1.34822e-05
373.15	0.003162	0.0134517	0.248002	0.125807	0.01487	0.000172074
373.15	0.01	0.0375634	0.334098	0.0820434	0.0380064	0.00174317
373.15	0.031623	0.0917418	0.396267	0.0459809	0.0816692	0.011756
373.15	0.1	0.175542	0.410361	0.0236374	0.130827	0.0423618
373.15	0.316228	0.255394	0.391402	0.0132938	0.158728	0.0820096
373.15	1.0	0.303966	0.373177	0.00948189	0.168123	0.107859
398.15	1e-06	3.80498e-06	0.00517581	0.246521	4.19328e-06	2.69829e-13
398.15	3e-06	1.09098e-05	0.00928249	0.244482	1.35887e-05	4.6986e-12
398.15	1e-05	3.52622e-05	0.0163368	0.24098	4.26401e-05	8.34283e-11
398.15	3.2e-05	0.000111055	0.0285566	0.234913	0.000133278	1.4214e-09
398.15	0.0001	0.000348837	0.0493923	0.224567	0.000414997	2.40828e-08
398.15	0.000316	0.00108806	0.0836016	0.207574	0.00127393	3.91168e-07
398.15	0.001	0.00334827	0.136561	0.18125	0.0038215	5.9496e-06
398.15	0.003162	0.0100619	0.210446	0.144458	0.0109897	8.07034e-05
398.15	0.01	0.0287954	0.296983	0.100943	0.0292858	0.000899184
398.15	0.031623	0.0740043	0.371985	0.0604482	0.0673468	0.00706006
398.15	0.1	0.153459	0.404831	0.0320783	0.118314	0.0310032
398.15	0.316228	0.240584	0.39486	0.0174804	0.153316	0.0701779
398.15	1.0	0.300061	0.376338	0.0117611	0.166614	0.100139
423.15	1e-06	2.54379e-06	0.00416104	0.246327	3.02187e-06	1.20704e-13
423.15	3e-06	8.38581e-06	0.00741311	0.244721	9.64992e-06	2.15557e-12
423.15	1e-05	2.66936e-05	0.0130757	0.241926	3.03486e-05	3.70492e-11
423.15	3.2e-05	8.39724e-05	0.022944	0.237054	9.52547e-05	6.38316e-10
423.15	0.0001	0.000264308	0.0399162	0.228672	0.000298104	1.08482e-08
423.15	0.000316	0.000825649	0.0682414	0.214678	0.000923467	1.79784e-07
423.15	0.001	0.00255433	0.113288	0.192405	0.00280907	2.81437e-06
423.15	0.003162	0.00775082	0.179153	0.159778	0.00826129	4.00183e-05
423.15	0.01	0.0225903	0.262503	0.118205	0.0227832	0.00048084
423.15	0.031623	0.060293	0.344819	0.0753654	0.0553579	0.00426661
423.15	0.1	0.133658	0.394148	0.041752	0.105544	0.0223136
423.15	0.316228	0.225006	0.395829	0.0225056	0.146627	0.0591539
423.15	1.0	0.294663	0.378851	0.0144111	0.164361	0.0923247
448.15	1e-06	2.13404e-06	0.00331454	0.245679	2.11233e-06	5.15741e-14
448.15	3e-06	6.55271e-06	0.00606826	0.244331	7.11639e-06	1.04359e-12
448.15	1e-05	2.09746e-05	0.0107042	0.242062	2.2345e-05	1.74743e-11
448.15	3.2e-05	6.56985e-05	0.0188111	0.238094	7.01552e-05	3.07491e-10
448.15	0.0001	0.000205713	0.0328526	0.231218	0.000220208	5.28368e-09
448.15	0.000316	0.000644765	0.0565765	0.219595	0.000686377	8.85019e-08
448.15	0.001	0.00200317	0.09508	0.200711	0.00210986	1.41652e-06
448.15	0.003162	0.00612275	0.153397	0.17205	0.00631512	2.08987e-05
448.15	0.01	0.0180973	0.231674	0.133353	0.0179131	0.000266745
448.15	0.031623	0.0497061	0.316977	0.0899612	0.0455483	0.00261378
448.15	0.1	0.116353	0.379451	0.0522707	0.0932389	0.0159016
448.15	0.316228	0.209268	0.394109	0.0283287	0.138965	0.0492145
448.15	1.0	0.28797	0.380555	0.0174452	0.161439	0.0845495
473.15	1e-06	1.86112e-06	0.00278662	0.244402	1.62749e-06	2.88776e-14
473.15	3e-06	5.15026e-06	0.00503707	0.243315	5.34122e-06	4.99969e-13
473.15	1e-05	1.65957e-05	0.00886948	0.241462	1.66963e-05	8.85148e-12
473.15	3.2e-05	5.23023e-05	0.0156822	0.238168	5.29528e-05	1.58151e-10
473.15	0.0001	0.000164558	0.027482	0.232461	0.000166703	2.73161e-09
473.15	0.000316	0.000516261	0.04757	0.222738	0.000521613	4.63012e-08
473.15	0.001	0.00160877	0.0807077	0.206678	0.00161649	7.5383e-07
473.15	0.003162	0.00494517	0.132266	0.18163	0.00490597	1.14533e-05
473.15	0.01	0.0147766	0.204712	0.146227	0.0142411	0.000153471
473.15	0.031623	0.0414958	0.289945	0.103657	0.0376148	0.00163097
473.15	0.1	0.10151	0.362028	0.0631998	0.0818621	0.0112927
473.15	0.316228	0.193875	0.389742	0.0348468	0.130659	0.0405125
473.15	1.0	0.280248	0.381318	0.0208618	0.157921	0.0769459
498.15	1e-06	1.17073e-06	0.00233691	0.242519	1.23833e-06	1.47885e-14
498.15	3e-06	4.05628e-06	0.00425651	0.241607	4.12101e-06	2.76009e-13
498.15	1e-05	1.36825e-05	0.00752401	0.240054	1.29692e-05	4.83105e-12
498.15	3.2e-05	4.27527e-05	0.0132763	0.237319	4.08906e-05	8.63285e-11
498.15	0.0001	0.000134153	0.0233042	0.23255	0.000128803	1.49783e-09
498.15	0.000316	0.000422172	0.0405063	0.224362	0.000404277	2.55348e-08
498.15	0.001	0.00131837	0.0692255	0.210672	0.00126039	4.21501e-07
498.15	0.003162	0.00407016	0.114865	0.188854	0.00386715	6.55267e-06
498.15	0.01	0.0122672	0.181368	0.156862	0.0114425	9.13555e-05
498.15	0.031623	0.0350586	0.264537	0.116089	0.0312138	0.00103833
498.15	0.1	0.0888849	0.34304	0.0741399	0.0716228	0.00802798
498.15	0.316228	0.179138	0.382969	0.0419174	0.122016	0.0330679
498.15	1.0	0.271726	0.381059	0.0246459	0.153885	0.0696197
523.15	1e-06	1.06312e-06	0.00213013	0.239874	1.10318e-06	8.92428e-15
523.15	3e-06	3.59054e-06	0.0035792	0.2392	3.12725e-06	1.62211e-13
523.15	1e-05	1.13233e-05	0.00641551	0.237881	1.01072e-05	2.76534e-12
523.15	3.2e-05	3.55344e-05	0.0113738	0.235576	3.21268e-05	4.93414e-11
523.15	0.0001	0.000111896	0.0199831	0.231571	0.000101138	8.59778e-10
523.15	0.000316	0.000351244	0.0348559	0.224645	0.000318372	1.47536e-08
523.15	0.001	0.00109923	0.0599294	0.212952	0.000997683	2.46074e-07
523.15	0.003162	0.0034055	0.100453	0.193992	0.00308903	3.89912e-06
523.15	0.01	0.0103359	0.161247	0.165352	0.00928754	5.61612e-05
523.15	0.031623	0.0299608	0.241144	0.127027	0.0260458	0.00067512
523.15	0.1	0.078209	0.323427	0.0847372	0.0625791	0.0057353
523.15	0.316228	0.16529	0.37415	0.0493646	0.113309	0.026829
523.15	1.0	0.262654	0.379738	0.0287664	0.149412	0.062665
548.15	1e-06	9.45084e-07	0.00178242	0.236599	8.2416e-07	6.26977e-15
548.15	3e-06	2.83416e-06	0.0030824	0.236012	2.47283e-06	9.74548e-14
548.15	1e-05	9.41014e-06	0.00555442	0.234894	8.07068e-06	1.63493e-12
548.15	3.2e-05	3.00185e-05	0.00982743	0.232961	2.55225e-05	2.92424e-11
548.15	0.0001	9.45167e-05	0.0173122	0.229574	8.06156e-05	5.1439e-10
548.15	0.000316	0.000296721	0.0302805	0.223701	0.000254336	8.86743e-09
548.15	0.001	0.000930123	0.0523183	0.213703	0.000800374	1.49289e-07
548.15	0.003162	0.00289055	0.0884161	0.19727	0.00249612	2.40179e-06
548.15	0.01	0.00882219	0.143889	0.171831	0.00760719	3.55487e-05
548.15	0.031623	0.0258702	0.219845	0.136359	0.0218517	0.000448027
548.15	0.1	0.0691771	0.303849	0.0947143	0.0546716	0.00412657
548.15	0.316228	0.152429	0.363698	0.0570081	0.104749	0.0216779
548.15	1.0	0.253224	0.377361	0.0331823	0.144582	0.0561424
573.15	1e-06	8.47597e-07	0.00146793	0.2326	5.92449e-07	3.29342e-15
573.15	3e-06	2.59013e-06	0.00274208	0.232043	2.07305e-06	5.4615e-14
573.15	1e-05	8.18857e-06	0.00484895	0.231122	6.518e-06	1.03359e-12
573.15	3.2e-05	2.54535e-05	0.00857984	0.22949	2.05965e-05	1.82821e-11
573.15	0.0001	8.08241e-05	0.0151267	0.226625	6.50564e-05	3.19959e-10
573.15	0.000316	0.000254342	0.0265291	0.221631	0.000205778	5.52991e-09
573.15	0.001	0.000797457	0.0460044	0.213087	0.000649314	9.36845e-08
573.15	0.003162	0.00248428	0.0782847	0.198876	0.00203783	1.52705e-06
573.15	0.01	0.00761828	0.128884	0.176432	0.006283	2.31231e-05
573.15	0.031623	0.0225555	0.20059	0.14403	0.0184312	0.000303364
573.15	0.1	0.0615354	0.28476	0.10384	0.0478045	0.00299607
573.15	0.316228	0.140622	0.352023	0.0646591	0.0965013	0.0174811
573.15	1.0	0.243638	0.373965	0.0378381	0.139478	0.0501009
598.15	1e-06	7.87732e-07	0.0013565	0.227836	5.33964e-07	1.74497e-15
598.15	3e-06	2.38359e-06	0.00244236	0.22738	1.73597e-06	4.18445e-14
598.15	1e-05	7.16735e-06	0.00427493	0.226609	5.34217e-06	6.57951e-13
598.15	3.2e-05	2.23073e-05	0.0075578	0.225228	1.6841e-05	1.17475e-11
598.15	0.0001	6.99901e-05	0.0133233	0.222802	5.31158e-05	2.05164e-10
598.15	0.000316	0.000220312	0.0234001	0.218558	0.000168118	3.55515e-09
598.15	0.001	0.00069185	0.0407205	0.211252	0.000532162	6.0647e-08
598.15	0.003162	0.00215925	0.069691	0.198993	0.00167887	9.98929e-07
598.15	0.01	0.00664733	0.115864	0.179309	0.00522797	1.54187e-05
598.15	0.031623	0.0198399	0.183234	0.150047	0.0156234	0.000209375
598.15	0.1	0.0550494	0.266428	0.111945	0.0418548	0.00219705
598.15	0.316228	0.129864	0.339496	0.0721417	0.08867	0.0140925
598.15	1.0	0.234049	0.369618	0.0426711	0.134178	0.0445633
623.15	1e-06	7.35665e-07	0.00125759	0.222458	4.82285e-07	1.40525e-15
623.15	3e-06	1.85739e-06	0.00208349	0.222125	1.32726e-06	2.44249e-14
623.15	1e-05	6.28527e-06	0.00376184	0.22145	4.34526e-06	4.30471e-13
623.15	3.2e-05	1.92791e-05	0.00667161	0.220279	1.37729e-05	7.6116e-12
623.15	0.0001	6.1052e-05	0.0118009	0.218213	4.36838e-05	1.34771e-10
623.15	0.000316	0.000192869	0.0207751	0.214598	0.000138667	2.35063e-09
623.15	0.001	0.000606271	0.036249	0.208356	0.000439874	4.03032e-08
623.15	0.003162	0.00189519	0.0623391	0.197803	0.00139392	6.6991e-07
623.15	0.01	0.0058526	0.104509	0.180629	0.00437811	1.05109e-05
623.15	0.031623	0.0175877	0.167593	0.154464	0.0133005	0.000147038
623.15	0.1	0.049508	0.248981	0.118915	0.036693	0.00162711
623.15	0.316228	0.120088	0.326413	0.0793001	0.0813031	0.0113687
623.15	1.0	0.224552	0.364402	0.0476168	0.128747	0.0395258
648.15	1e-06	6.73807e-07	0.00101275	0.21662	3.27599e-07	9.92132e-16
648.15	3e-06	1.7249e-06	0.00184728	0.2163	1.09177e-06	1.68762e-14
648.15	1e-05	5.5333e-06	0.00335001	0.215724	3.60555e-06	2.97941e-13
648.15	3.2e-05	1.69956e-05	0.00595784	0.214724	1.14868e-05	5.23812e-12
648.15	0.0001	5.39701e-05	0.0105226	0.212973	3.62909e-05	9.12982e-11
648.15	0.000316	0.000170398	0.0185405	0.209897	0.000115203	1.59363e-09
648.15	0.001	0.000535947	0.0324333	0.204563	0.000366352	2.74326e-08
648.15	0.003162	0.00167762	0.0560072	0.195493	0.00116541	4.59677e-07
648.15	0.01	0.00519587	0.0945707	0.18057	0.00368809	7.31402e-06
648.15	0.031623	0.0157041	0.153506	0.157372	0.0113687	0.000104982
648.15	0.1	0.0447563	0.232497	0.124672	0.0322125	0.00121731
648.15	0.316228	0.111246	0.313024	0.0859837	0.0744294	0.00918888
648.15	1.0	0.215258	0.358405	0.0526004	0.123247	0.0349823
673.15	1e-06	3.39456e-07	0.000944013	0.210314	2.96623e-07	5.44895e-16
673.15	3e-06	1.62465e-06	0.00172205	0.210031	9.89805e-07	1.19185e-14
673.15	1e-05	4.88622e-06	0.00302755	0.209555	3.07051e-06	2.09263e-13
673.15	3.2e-05	1.52967e-05	0.00534156	0.208713	9.62384e-06	3.61578e-12
673.15	0.0001	4.80955e-05	0.00942817	0.207226	3.03455e-05	6.31172e-11
673.15	0.000316	0.000151721	0.0166413	0.2046	9.65421e-05	1.10613e-09
673.15	0.001	0.000477797	0.0291561	0.200044	0.000307257	1.9093e-08
673.15	0.003162	0.00149708	0.0505273	0.192254	0.000980719	3.22024e-07
673.15	0.01	0.00464769	0.085844	0.179326	0.0031239	5.18607e-06
673.15	0.031623	0.0141164	0.140819	0.158898	0.00975435	7.61283e-05
673.15	0.1	0.0406632	0.217002	0.129191	0.0283184	0.000919973
673.15	0.316228	0.10327	0.299523	0.0920628	0.0680513	0.00744773
673.15	1.0	0.206249	0.351721	0.0575448	0.117732	0.030913
698.15	1e-06	3.19992e-07	0.000882011	0.203728	2.69349e-07	4.53202e-16
698.15	3e-06	1.24135e-06	0.00152663	0.203506	8.08799e-07	8.23112e-15
698.15	1e-05	4.29821e-06	0.00268928	0.203105	2.5189e-06	1.36551e-13
698.15	3.2e-05	1.37935e-05	0.00478355	0.202384	8.02249e-06	2.5204e-12
698.15	0.0001	4.32181e-05	0.00849498	0.201105	2.55871e-05	4.46251e-11
698.15	0.000316	0.000136111	0.0149976	0.198866	8.13504e-05	7.81899e-10
698.15	0.001	0.000428803	0.0263226	0.194967	0.000259322	1.35446e-08
698.15	0.003162	0.00134537	0.0457548	0.188278	0.000830095	2.29813e-07
698.15	0.01	0.00418448	0.078147	0.1771	0.00265898	3.7398e-06
698.15	0.031623	0.0127636	0.129377	0.159206	0.00839742	5.59794e-05
698.15	0.1	0.0371091	0.202477	0.132502	0.0249234	0.00070173
698.15	0.316228	0.0960585	0.286042	0.0974422	0.0621437	0.00605406
698.15	1.0	0.197548	0.344429	0.0623788	0.112236	0.0272814
723.15	1e-06	3.02695e-07	0.000825922	0.196972	2.45009e-07	3.80321e-16
723.15	3e-06	1.16518e-06	0.00134799	0.196802	6.54299e-07	5.42847e-15
723.15	1e-05	3.78539e-06	0.00242729	0.196451	2.12825e-06	9.95952e-14
723.15	3.2e-05	1.22108e-05	0.00432794	0.195832	6.80824e-06	1.82946e-12
723.15	0.0001	3.88931e-05	0.00767608	0.194743	2.16454e-05	3.20624e-11
723.15	0.000316	0.000123089	0.013573	0.192825	6.89692e-05	5.63712e-10
723.15	0.001	0.000387497	0.0238612	0.189484	0.000220201	9.78919e-09
723.15	0.003162	0.00121668	0.0415846	0.183734	0.0007066	1.66884e-07
723.15	0.01	0.00379066	0.0713452	0.174077	0.00227419	2.74004e-06
723.15	0.031623	0.0116046	0.119063	0.158461	0.00725405	4.17192e-05
723.15	0.1	0.0340138	0.188918	0.134665	0.0219638	0.000540266
723.15	0.316228	0.089552	0.272707	0.102039	0.0566927	0.00493871
723.15	1.0	0.189214	0.336613	0.0670218	0.106798	0.0240592
748.15	1e-06	2.77143e-07	0.000632832	0.1902	1.48952e-07	2.62776e-16
748.15	3e-06	1.10828e-06	0.00126503	0.190006	5.95885e-07	3.93715e-15
748.15	1e-05	3.59072e-06	0.00223398	0.189708	1.86492e-06	7.40906e-14
748.15	3.2e-05	1.13097e-05	0.00393885	0.189185	5.83171e-06	1.33503e-12
748.15	0.0001	3.52977e-05	0.00697242	0.188253	1.84613e-05	2.3493e-11
748.15	0.000316	0.000111738	0.0123362	0.186609	5.88414e-05	4.1323e-10
748.15	0.001	0.000352406	0.0217127	0.183739	0.000188047	7.19044e-09
748.15	0.003162	0.00110688	0.037921	0.178791	0.000604567	1.23078e-07
748.15	0.01	0.00345306	0.065317	0.170445	0.00195405	2.03708e-06
748.15	0.031623	0.0106043	0.109763	0.156845	0.00628744	3.14823e-05
748.15	0.1	0.031303	0.1763	0.135783	0.0193814	0.000419651
748.15	0.316228	0.0836727	0.259613	0.105814	0.0516728	0.00404376
748.15	1.0	0.181262	0.328348	0.0714013	0.10144	0.021209
773.15	1e-06	2.64358e-07	0.000595069	0.183413	1.35998e-07	2.24022e-16
773.15	3e-06	1.04818e-06	0.00111289	0.183263	4.76304e-07	3.14059e-15
773.15	1e-05	3.16174e-06	0.00201539	0.183001	1.56697e-06	5.75802e-14
773.15	3.2e-05	1.02543e-05	0.00358463	0.182547	4.98412e-06	9.92225e-13
773.15	0.0001	3.23175e-05	0.00635809	0.181744	1.58357e-05	1.74646e-11
773.15	0.000316	0.000102039	0.0112522	0.180329	5.04647e-05	3.07405e-10
773.15	0.001	0.000322118	0.0198292	0.177857	0.000161462	5.36374e-09
773.15	0.003162	0.00101201	0.0346983	0.173588	0.000520039	9.2139e-08
773.15	0.01	0.00316156	0.0599646	0.166367	0.00168663	1.53509e-06
773.15	0.031623	0.00973572	0.101378	0.154533	0.00546824	2.40395e-05
773.15	0.1	0.028918	0.164592	0.13598	0.017128	0.000328762
773.15	0.316228	0.0783533	0.246843	0.108756	0.0470608	0.00332378
773.15	1.0	0.173704	0.319702	0.0754499	0.0961852	0.0186948
798.15	1e-06	2.52811e-07	0.000560686	0.176733	1.24423e-07	9.61713e-17
798.15	3e-06	1.00295e-06	0.00104867	0.1766	4.35797e-07	2.69676e-15
798.15	1e-05	3.01615e-06	0.00185755	0.176379	1.3713e-06	4.29568e-14
798.15	3.2e-05	9.30489e-06	0.00328486	0.175989	4.31096e-06	7.3943e-13
798.15	0.0001	2.96332e-05	0.00582352	0.175296	1.36793e-05	1.31747e-11
798.15	0.000316	9.37604e-05	0.0103051	0.174075	4.3551e-05	2.32057e-10
798.15	0.001	0.000295708	0.018172	0.171939	0.000139375	4.05659e-09
798.15	0.003162	0.000930179	0.0318477	0.168245	0.00044948	6.99099e-08
798.15	0.01	0.0029085	0.0552023	0.161984	0.00146238	1.17177e-06
798.15	0.031623	0.00897711	0.0938134	0.151684	0.0047722	1.85609e-05
798.15	0.1	0.0268103	0.15376	0.135392	0.0151618	0.000259691
798.15	0.316228	0.0735323	0.234467	0.11089	0.0428341	0.0027428
798.15	1.0	0.166541	0.310746	0.0791093	0.0910495	0.0164812
